# Supplementary material for: Determination of 19 Steroid Hormones in Human Serum and Urine Using Liquid Chromatography-Tandem Mass Spectrometry
Source: MDPI journal article supplement (doi:10.3390/toxics10110687), 2022-11-12
Supplement: s1 [file s1]

## Supporting Information

# Determination of 19 Steroid Hormones in Human Serum and Urine Using Liquid Chromatography-Tandem Mass Spectrometry

Zhong-Min Li <sup>1,2</sup> and Kurunthachalam Kannan <sup>1,2,\*</sup>

<sup>1</sup> Department of Pediatrics, New York University Grossman School of Medicine, New York, NY 10016, USA

<sup>2</sup> Department of Environmental Medicine, New York University Grossman School of Medicine, New York, NY 10016, USA

\* Correspondence: [kurunthachalam.kannan@nyulangone.org](mailto:kurunthachalam.kannan@nyulangone.org); Tel.: +1-(212)-263-1546

Submission to: Toxics

### **Sample cleanup procedure using SPE**

A 500- $\mu$ L aliquot of urine sample was pipetted into a 15-mL glass tube. Following spiking 2.5–12.5 ng of isotopically labeled internal standards, 500  $\mu$ L of 1 M  $\text{NH}_4\text{OAc}$  buffer (pH 5.5) containing 5 mg/mL of L-ascorbic acid and 20  $\mu$ L of ALS enzyme (2000 units) was added. After gentle mix, the samples were incubated overnight (~ 15 h) at 37 °C with shaking at 100 rpm (Jeio Tech Co., Seoul, Korea). After incubation, 1 mL of HPLC-grade water was added into each sample, and the samples were subjected for ultrasonication for 15 min. The samples were then loaded onto SPE cartridges (Bond Elut C18, Bond Elut Plexa, and Bond Elut NEXUS) which have been preconditioned with 2 mL of MeOH and 2 mL of water. The cartridges were then washed with 2 mL of water:MeOH (95:5, *v/v*) and dried for 3 min using a vacuum pump. The analytes were eluted into a 15-mL glass tube using 3 mL MeOH. The elute was evaporated to dryness under gentle  $\text{N}_2$  at 25 °C. Thereafter, 125  $\mu$ L of sodium bicarbonate buffer (0.1 M, pH 9.0) and 125  $\mu$ L of dansyl chloride (1 mg/mL in acetone) were added, vortexed vigorously (~30 sec), and immediately kept at 60 °C for 5 min. The samples were then transferred into amber glass vials for LC-MS/MS analysis.

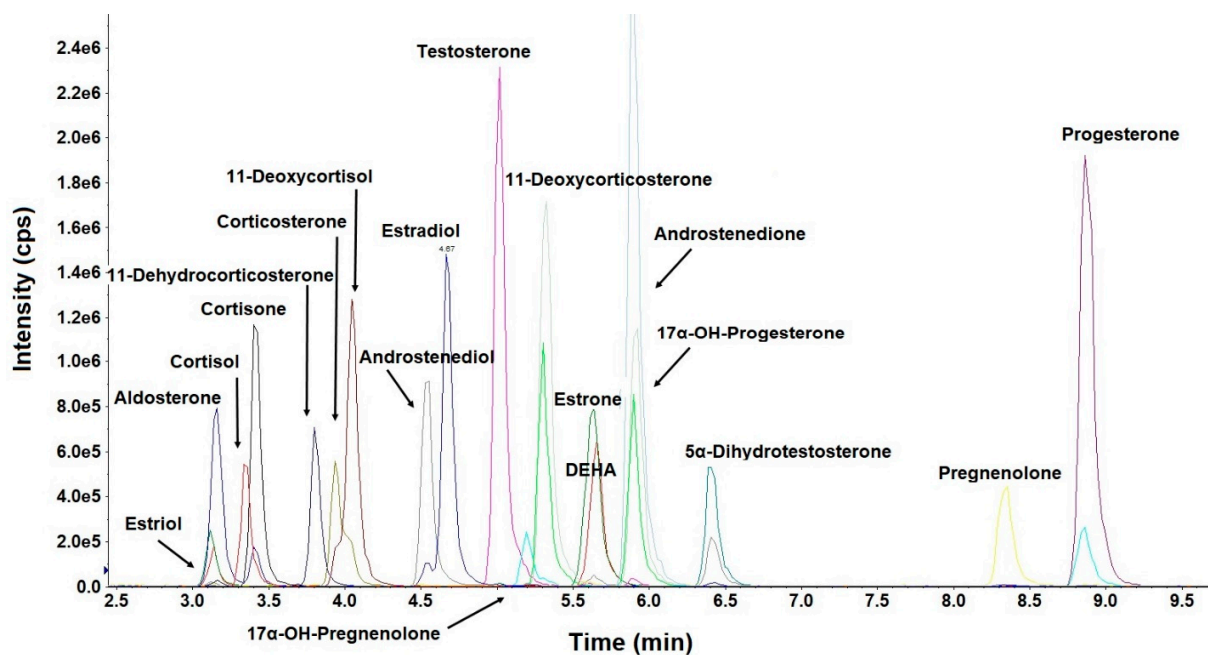

**Figure S1** Representative LC-MS/MS chromatograms of 19 steroid hormones without derivatization. Concentrations of the target analytes were 100 ng/mL; Injection volume was 10  $\mu$ L.

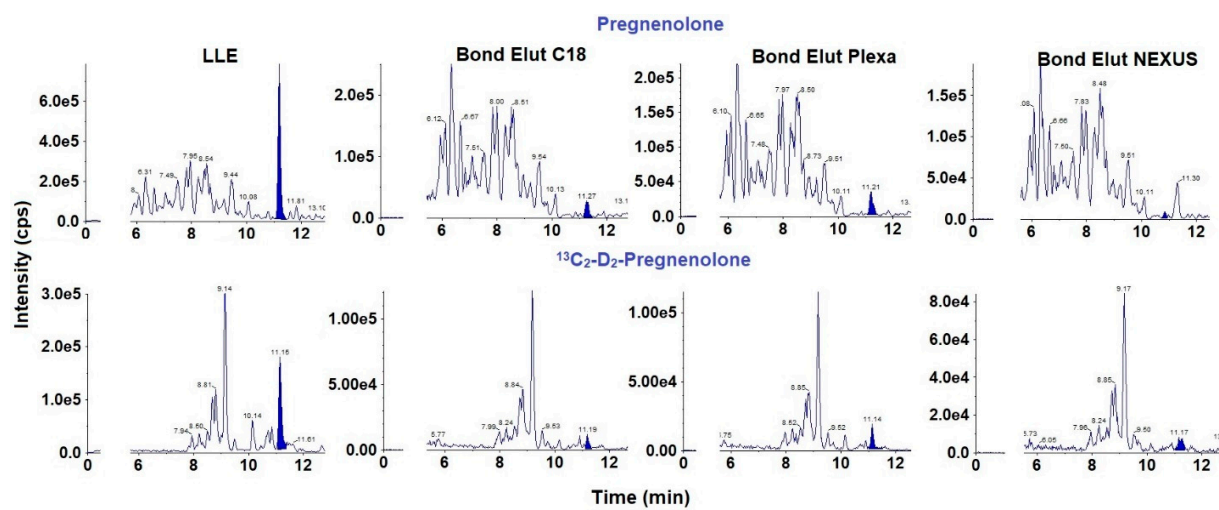

**Figure S2** Comparison of pregnenolone in serum following extraction with LLE, Bond Elut C18, Bond Elut Plexa, and Bond Elut NEXUS. Analyte concentration was 100 ng/mL, and the injection volume was 10  $\mu\text{L}$ .

| Analytes                                                                                                                 | Internal standards                                                                                                                                   |
|--------------------------------------------------------------------------------------------------------------------------|------------------------------------------------------------------------------------------------------------------------------------------------------|
| <b>Estrogen</b>                                                                                                          |                                                                                                                                                      |
| 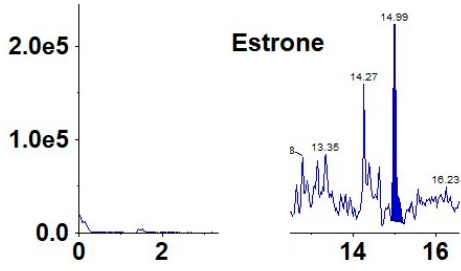 <p><b>Estrone</b></p>                  |  <p><b><sup>13</sup>C<sub>3</sub>-Estrone</b></p>                  |
|  <p><b>Estradiol</b></p>               |  <p><b><sup>13</sup>C<sub>2</sub>-Estradiol</b></p>               |
|  <p><b>Estriol</b></p>                |  <p><b><sup>13</sup>C<sub>3</sub>-Estriol</b></p>                |
| <b>Androgen</b>                                                                                                          |                                                                                                                                                      |
|  <p><b>Testosterone</b></p>           |  <p><b><sup>13</sup>C<sub>3</sub>-Testosterone</b></p>           |
|  <p><b>5α-Dihydrotestosterone</b></p> |  <p><b><sup>13</sup>C<sub>3</sub>-5α-Dihydrotestosterone</b></p> |

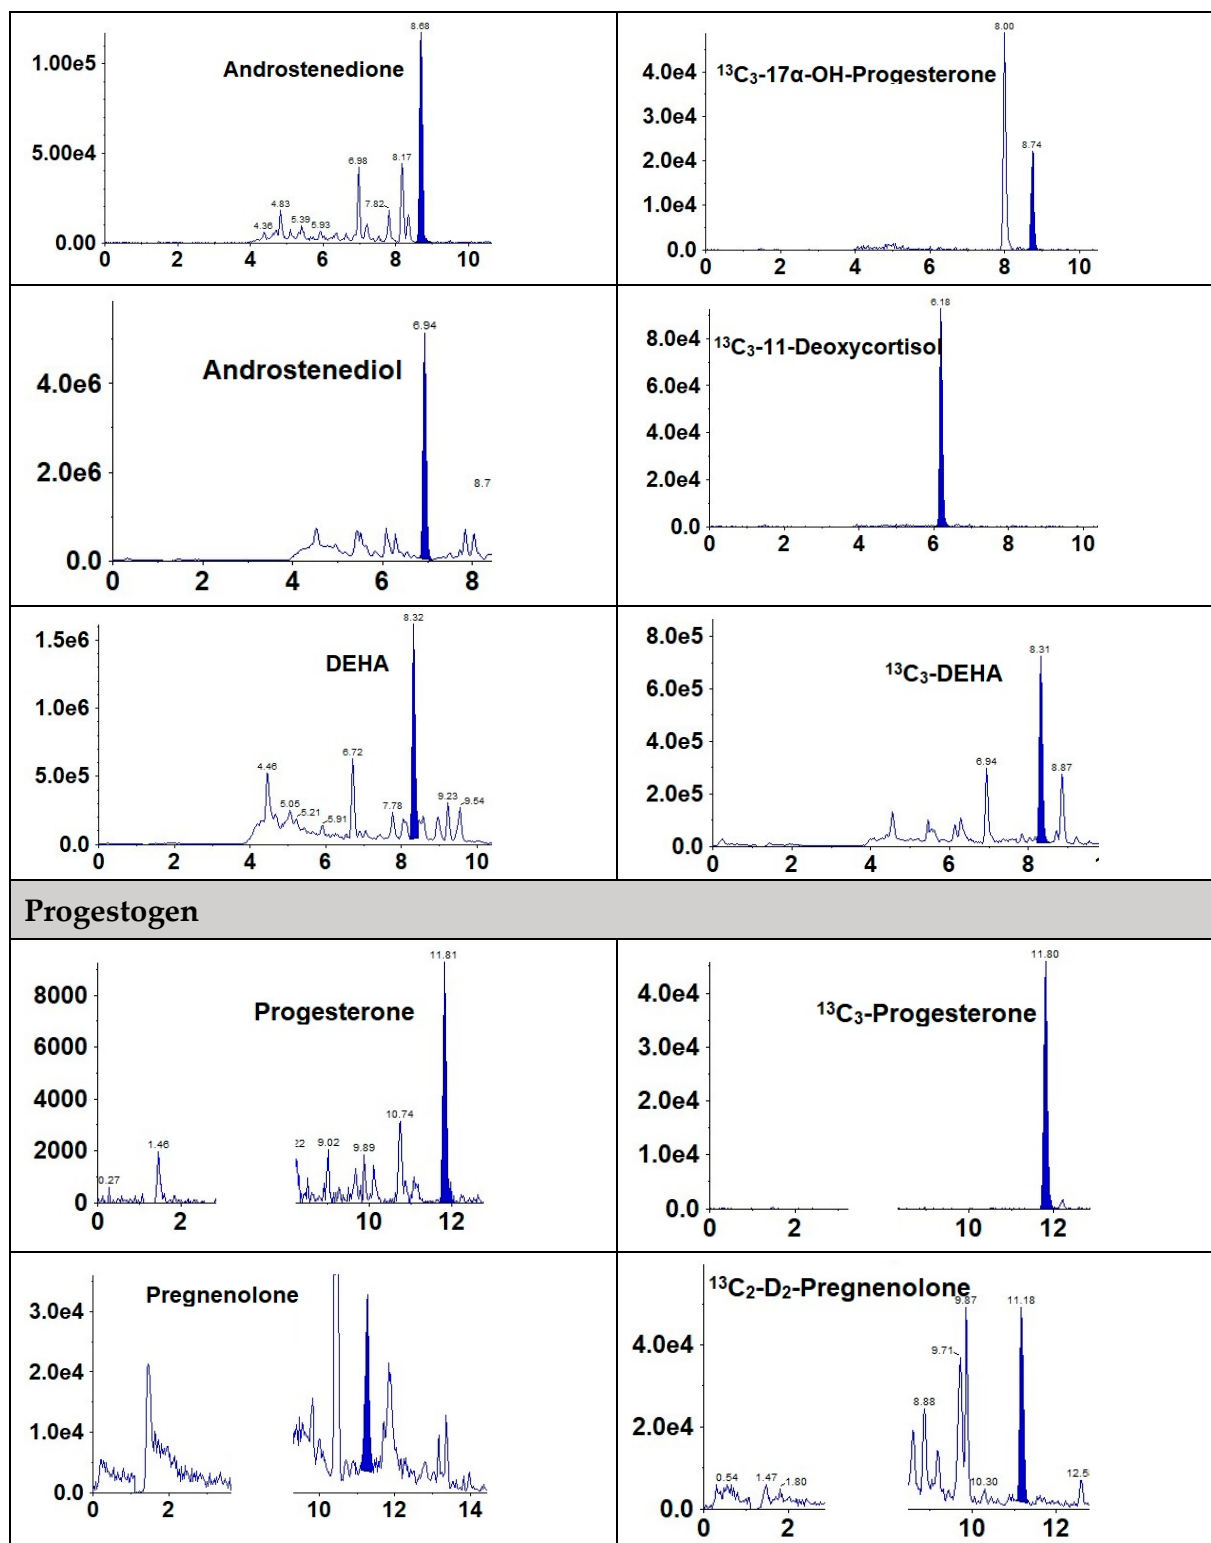

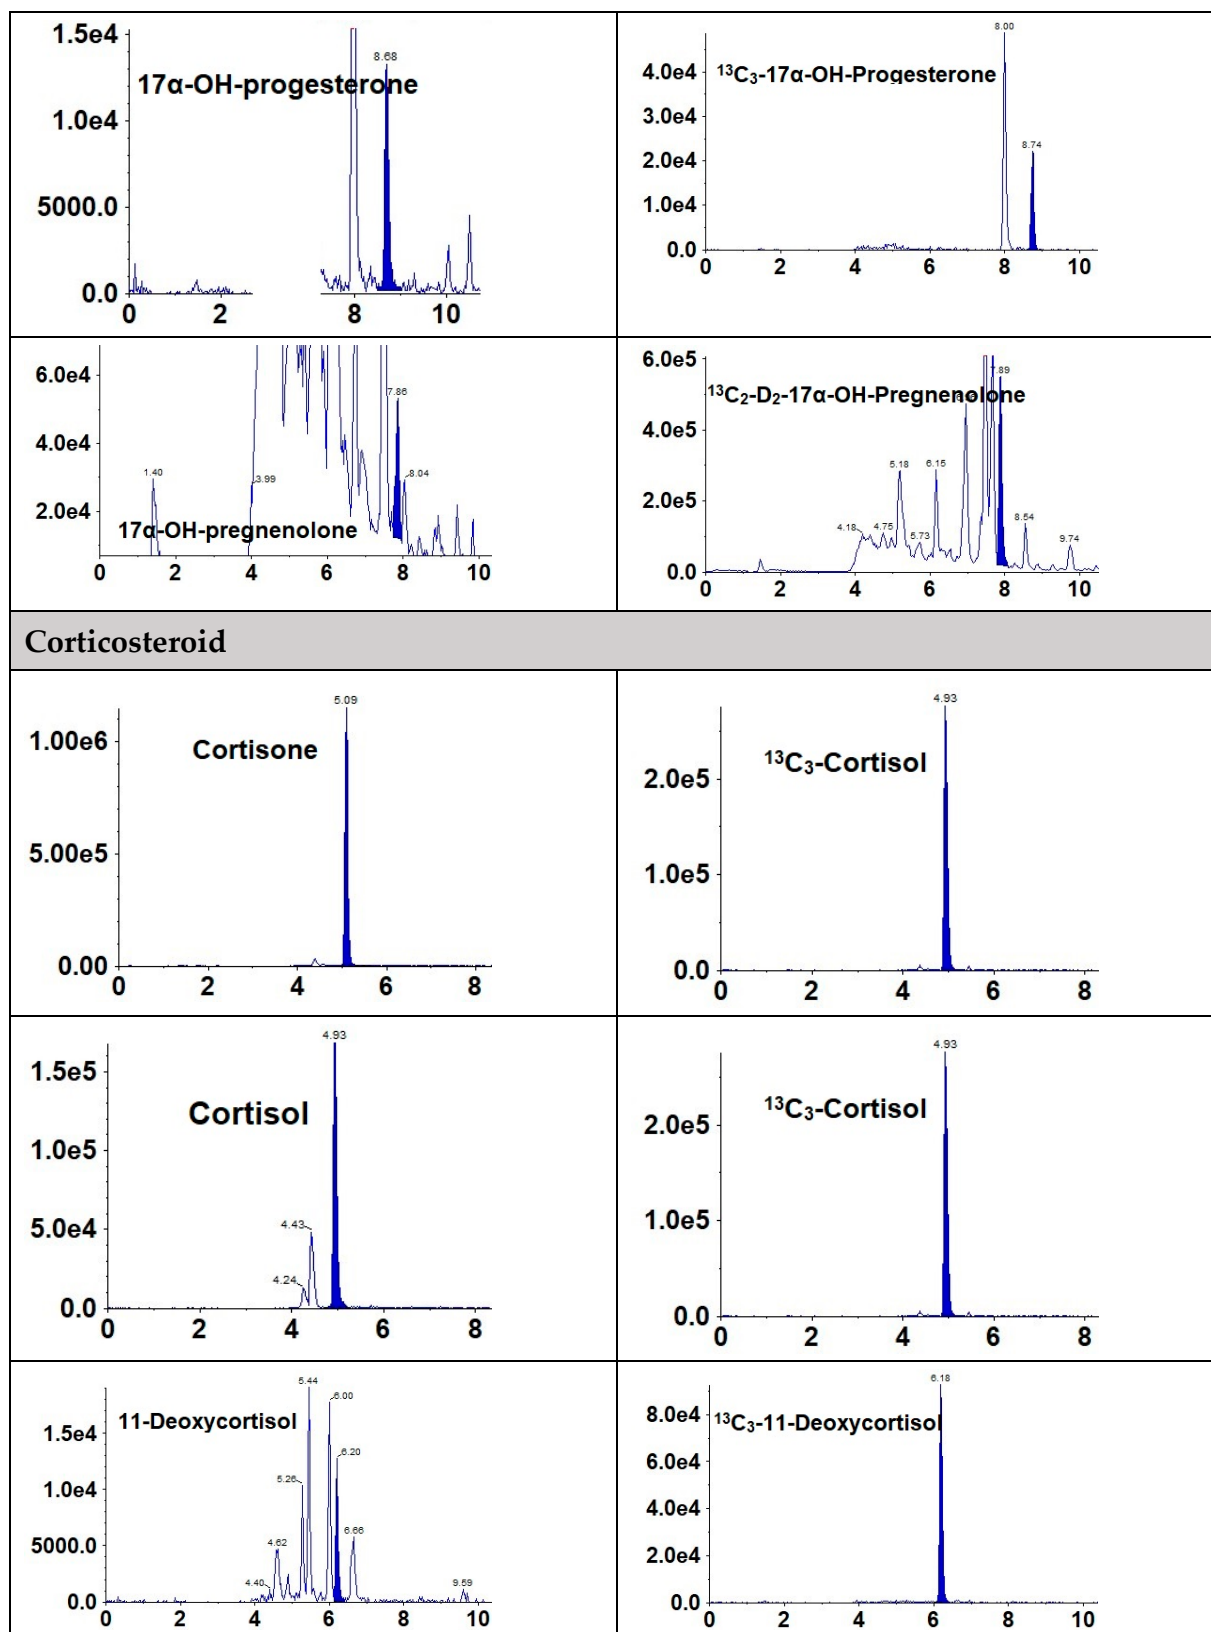

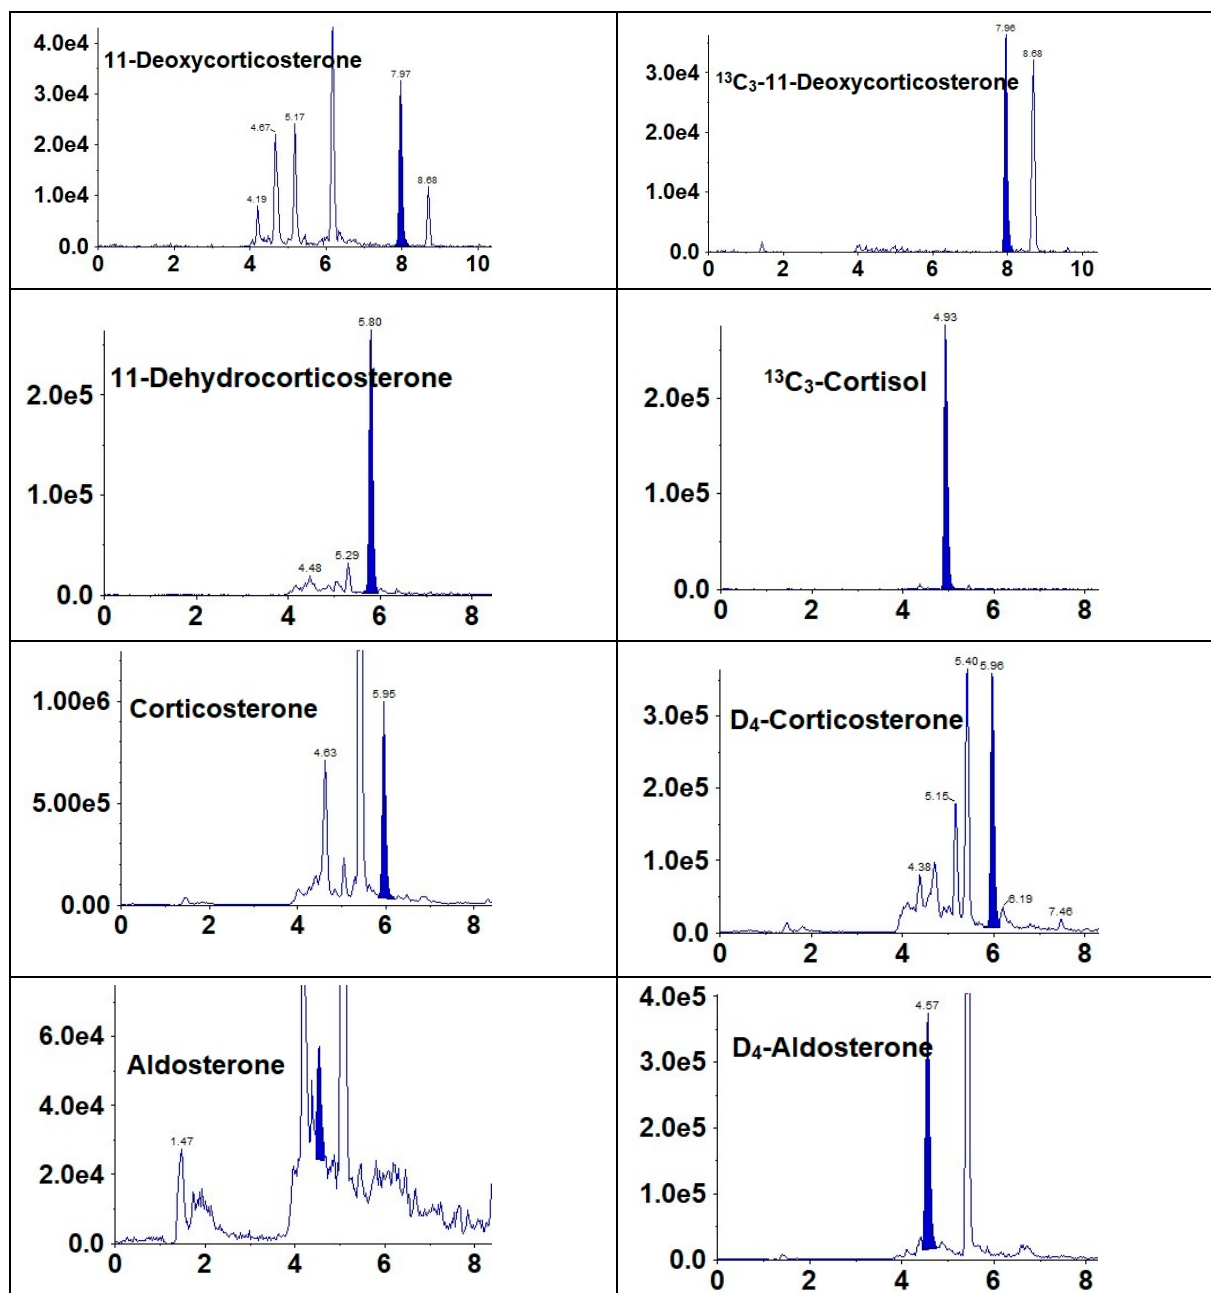

**Figure S3** Representative chromatograms of 19 steroid hormones found in human urine (injection volume: 10  $\mu\text{L}$ ).



| Analytes                                                                                                                 | Internal standards                                                                                                                                   |
|--------------------------------------------------------------------------------------------------------------------------|------------------------------------------------------------------------------------------------------------------------------------------------------|
| <b>Estrogen</b>                                                                                                          |                                                                                                                                                      |
| 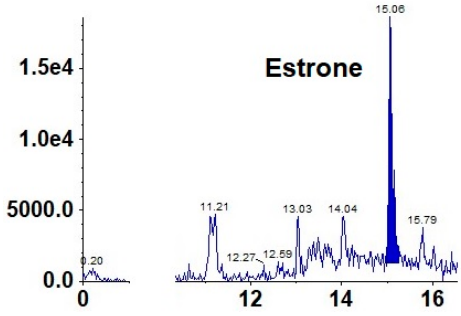 <p><b>Estrone</b></p>                  |  <p><b><sup>13</sup>C<sub>3</sub>-Estrone</b></p>                  |
|  <p><b>Estradiol</b><br/>&lt; LOD</p>  |  <p><b><sup>13</sup>C<sub>2</sub>-Estradiol</b></p>               |
|  <p><b>Estriol</b><br/>&lt; LOD</p>   |  <p><b><sup>13</sup>C<sub>3</sub>-Estriol</b></p>                |
| <b>Androgen</b>                                                                                                          |                                                                                                                                                      |
|  <p><b>Testosterone</b></p>           |  <p><b><sup>13</sup>C<sub>3</sub>-Testosterone</b></p>           |
|  <p><b>5α-Dihydrotestosterone</b></p> |  <p><b><sup>13</sup>C<sub>3</sub>-5α-Dihydrotestosterone</b></p> |

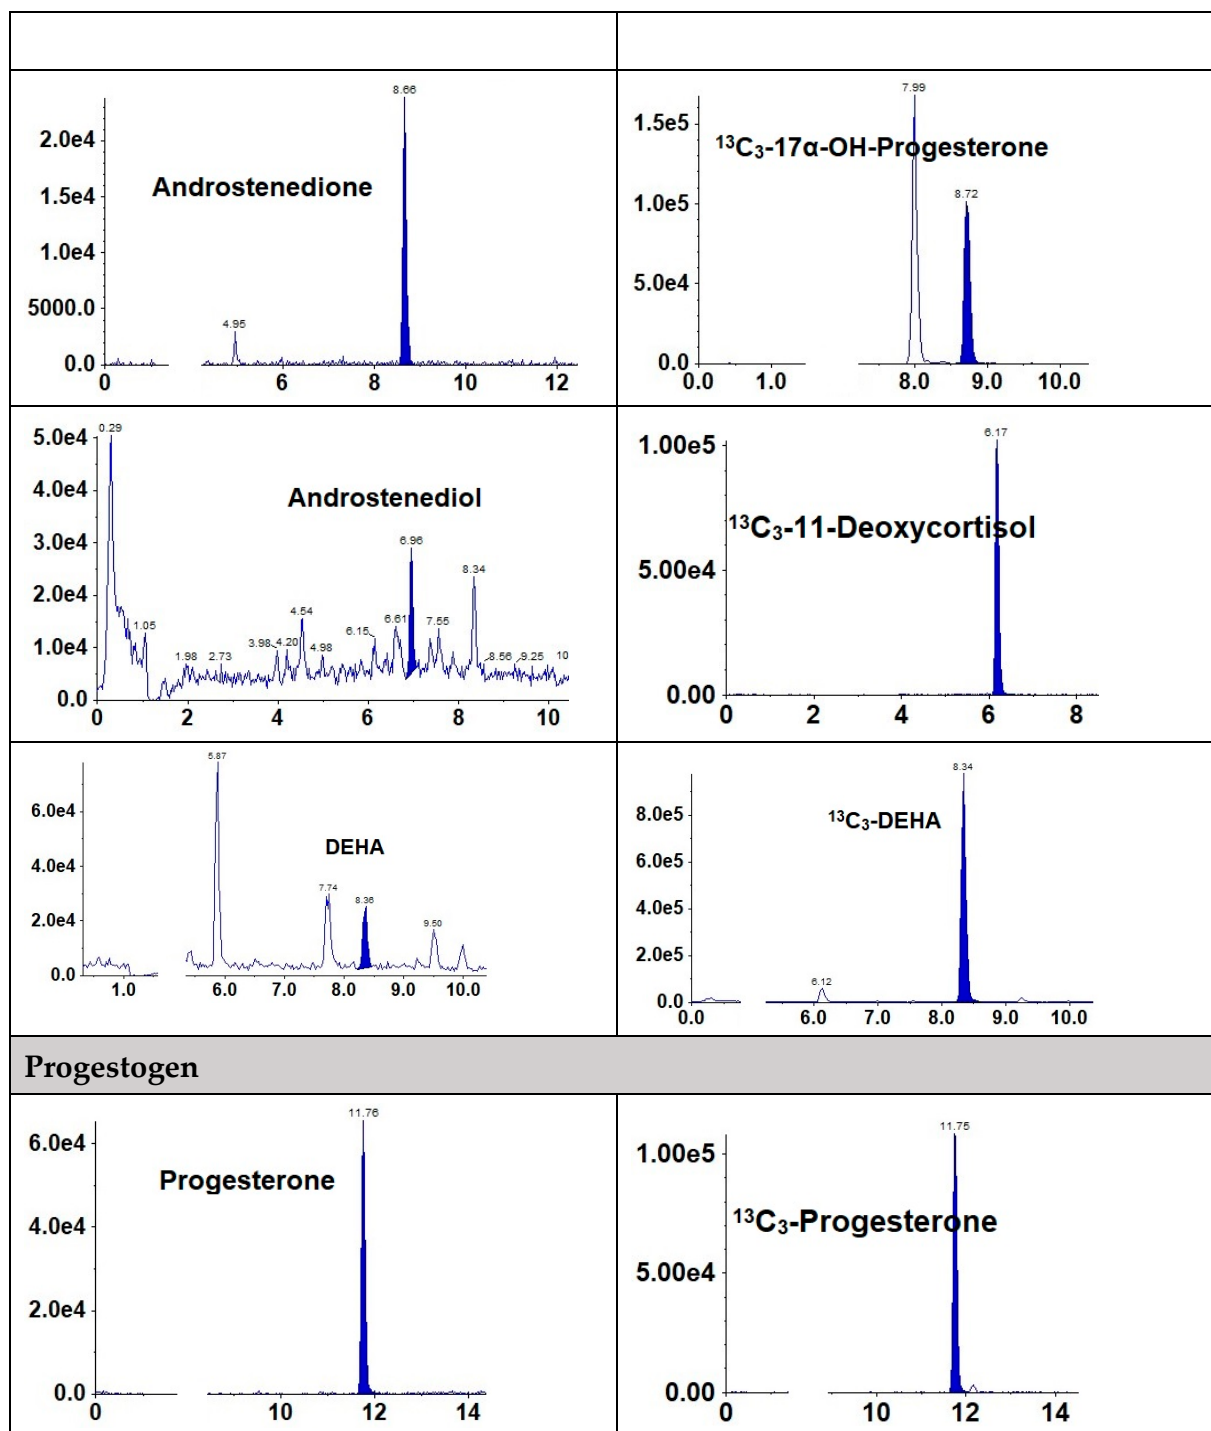

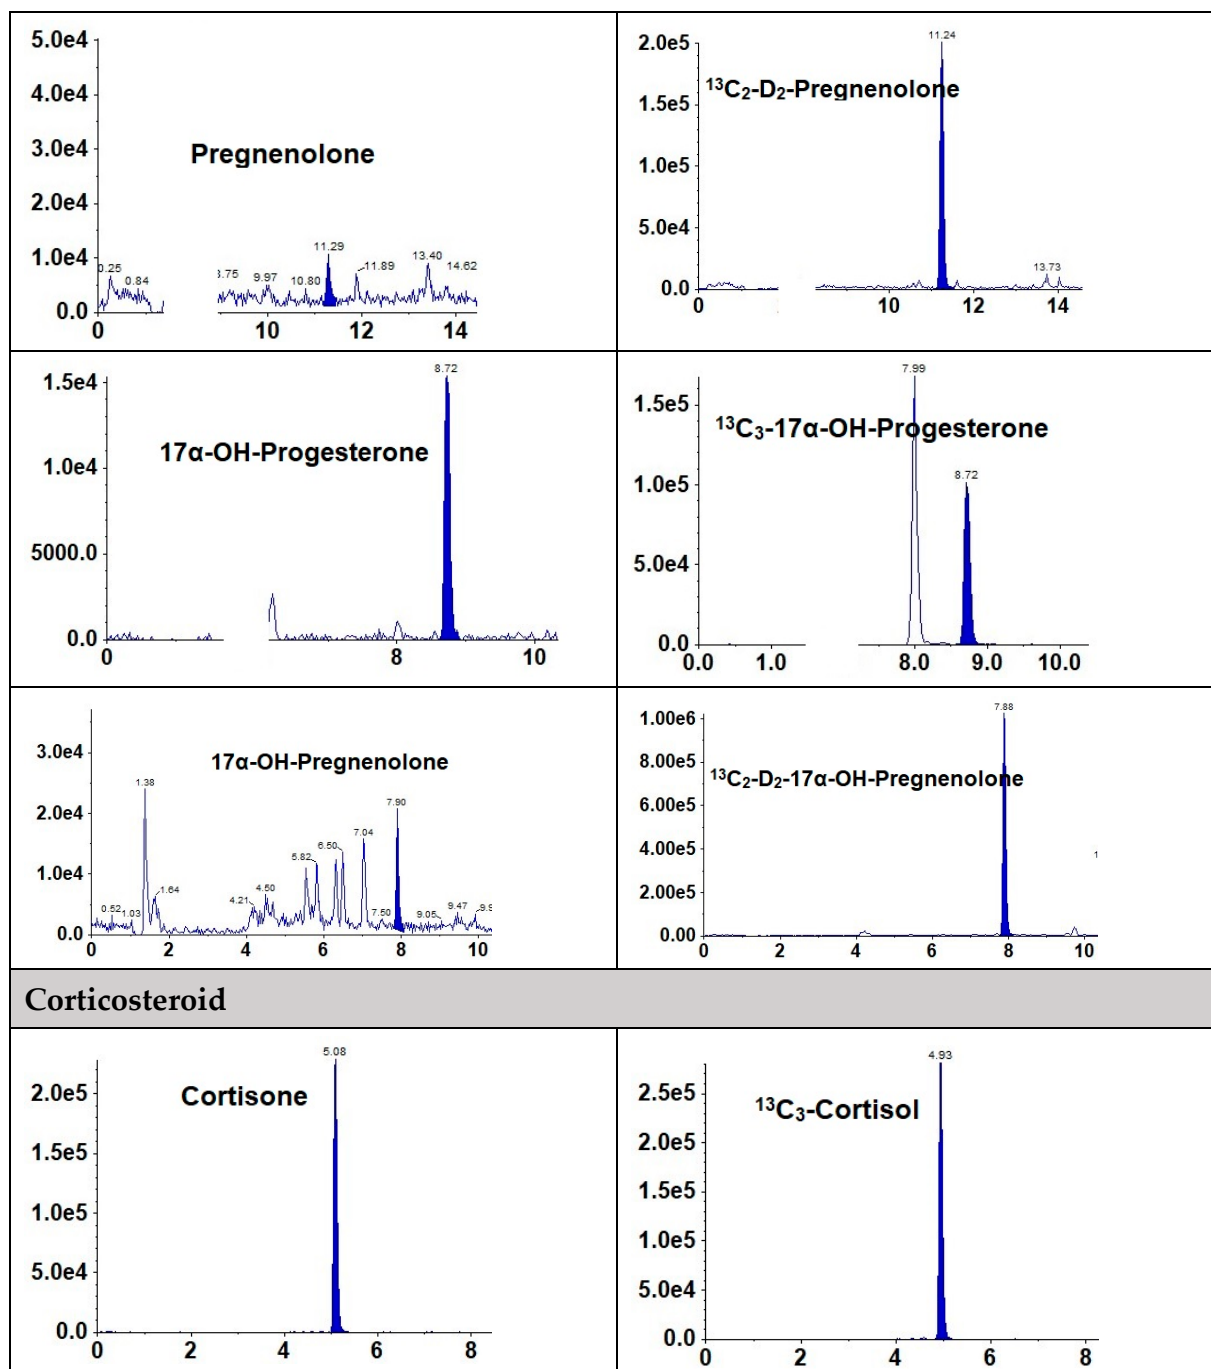

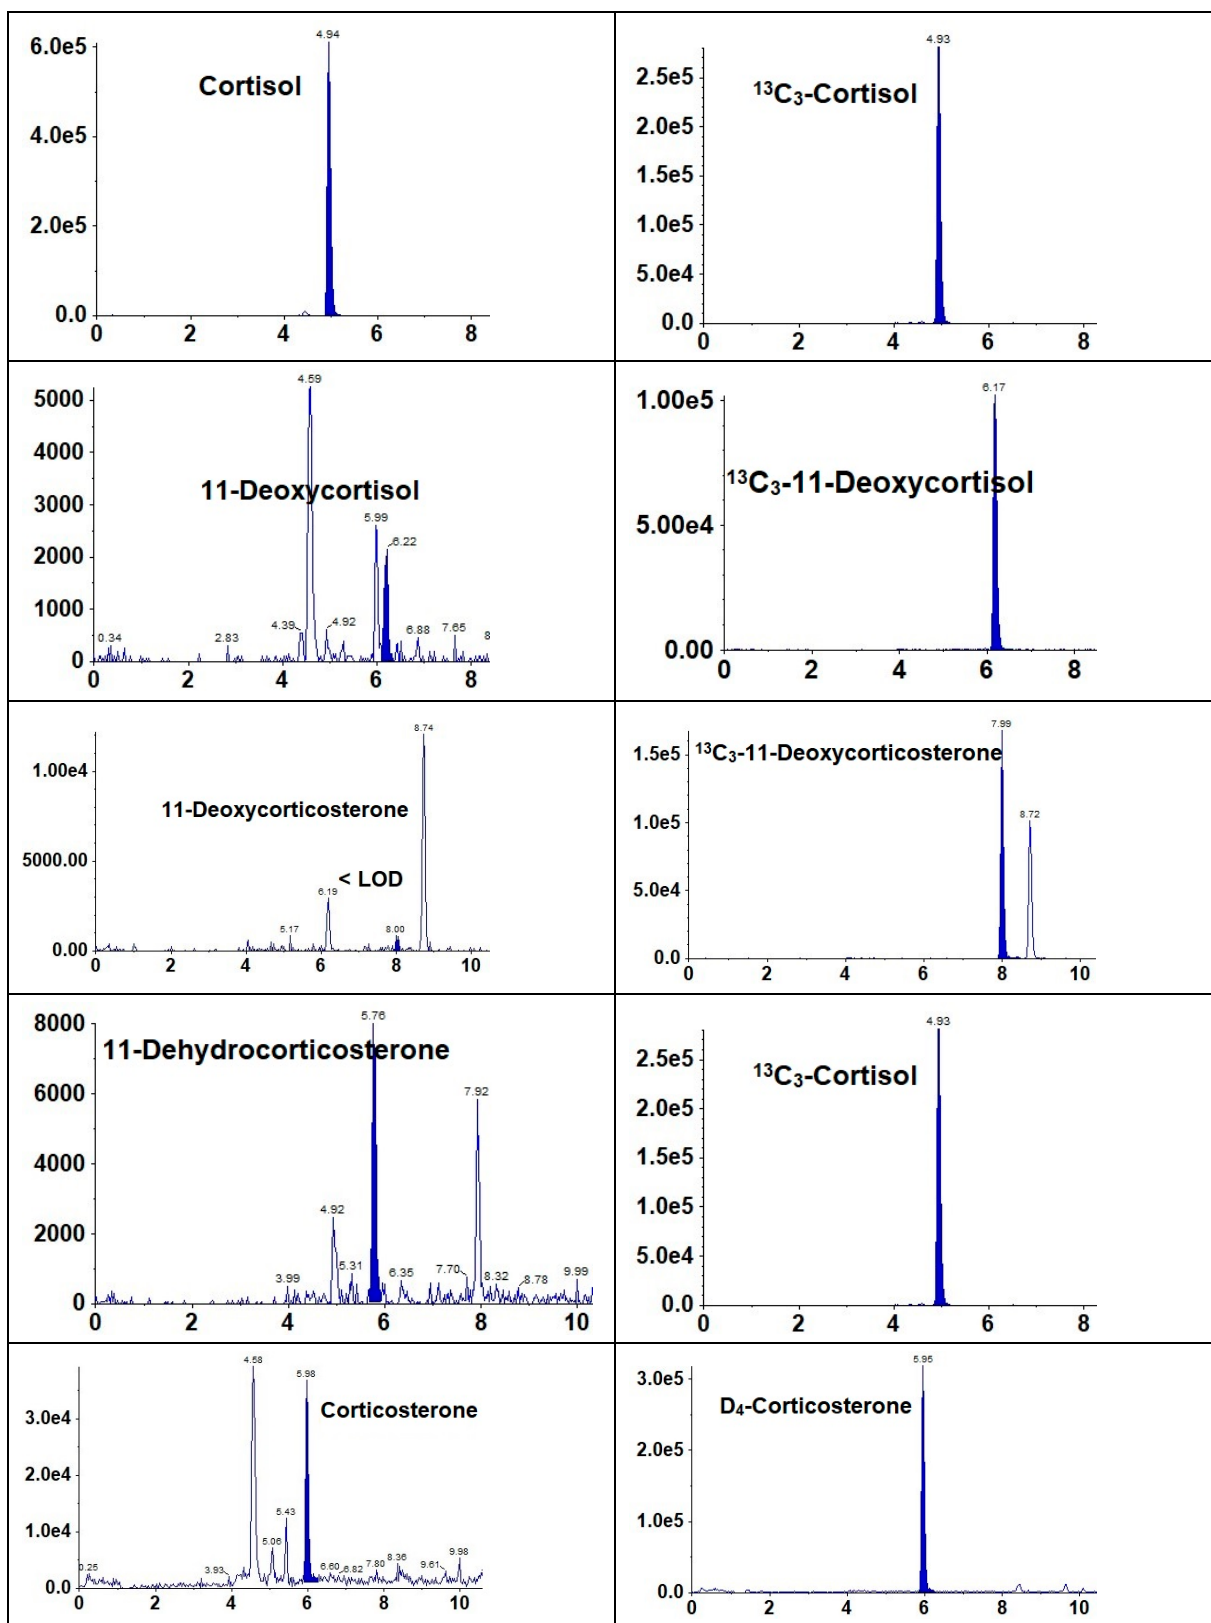

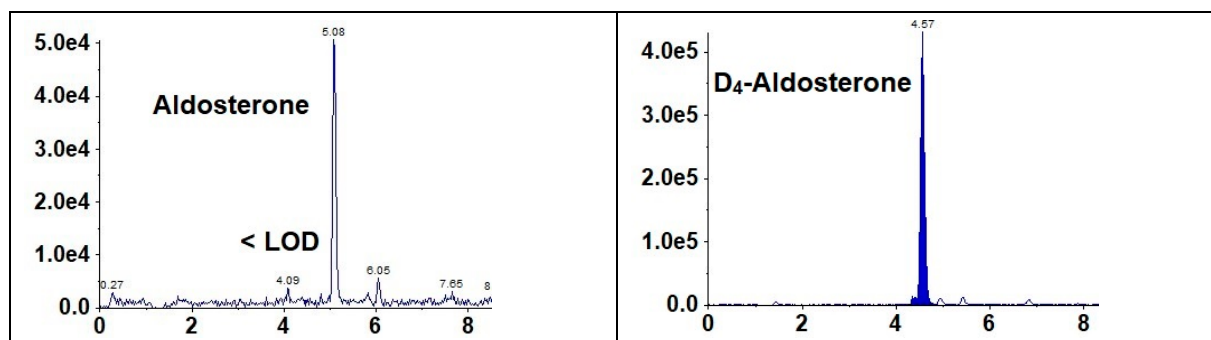

**Figure S4** Representative chromatograms of 19 steroid hormones found in human serum (injection volume: 10  $\mu$ L)

**Table S1** Optimized MRM parameters for the estrogens.

| Name                                    | CAS     | Q1 ( <i>m/z</i> ) | Q3 ( <i>m/z</i> ) | DP (V) | CE (V) | EP (V) | CXP (V) | Dwell (ms) |
|-----------------------------------------|---------|-------------------|-------------------|--------|--------|--------|---------|------------|
| Target analytes                         |         |                   |                   |        |        |        |         |            |
| Estrone                                 | 53-16-7 | 271               | 159 (q)           | 110    | 28     | 10     | 19      | 20         |
|                                         |         |                   | 133 (c)           | 138    | 29     | 10     | 12      | 20         |
| Estradiol                               | 50-28-2 | 255               | 159 (q)           | 123    | 23     | 10     | 10      | 20         |
|                                         |         |                   | 133 (c)           | 146    | 22     | 10     | 10      | 20         |
| Estriol                                 | 50-27-1 | 271               | 253 (q)           | 74     | 13     | 10     | 29      | 20         |
|                                         |         |                   | 159 (c)           | 113    | 35     | 10     | 14      | 20         |
| Internal standards                      |         |                   |                   |        |        |        |         |            |
| <sup>13</sup> C <sub>3</sub> -Estrone   |         | 274               | 256               | 120    | 16     | 10     | 15      | 20         |
| <sup>13</sup> C <sub>2</sub> -Estradiol |         | 257               | 161               | 126    | 26     | 10     | 10      | 20         |
| <sup>13</sup> C <sub>3</sub> -Estriol   |         | 274               | 256               | 100    | 14     | 10     | 16      | 20         |

Abbreviations: q, quantification transition; c, confirmation transition.

**Table S2** Comparison of the spike-recoveries of all analytes in serum following extraction with LLE, Bond Elut C18 (60 mg/3 mL), Bond Elut Plexa (60 mg/3 mL), and Bond Elut NEXUS (60 mg/3 mL). Analytes were spiked at 100 ng/mL, injection volume was 10  $\mu$ L.

| Analytes                        | LLE (%)                          | Bond Elut C18 (%) | Bond Elut Plexa (%)              | Bond Elut NEXUS (%) |
|---------------------------------|----------------------------------|-------------------|----------------------------------|---------------------|
| <b>Estrogen</b>                 |                                  |                   |                                  |                     |
| Estrone                         | 99.3 $\pm$ 2.5                   | 88.0 $\pm$ 3.3    | 92.6 $\pm$ 2.3                   | 90.5 $\pm$ 7.0      |
| Estradiol                       | 86.5 $\pm$ 1.4                   | 64.4 $\pm$ 3.5    | 61.7 $\pm$ 1.5                   | 61.6 $\pm$ 3.6      |
| Estriol                         | 99.1 $\pm$ 5.5                   | 93.0 $\pm$ 2.1    | 88.2 $\pm$ 1.5                   | 90.7 $\pm$ 2.5      |
| <b>Androgen</b>                 |                                  |                   |                                  |                     |
| Testosterone                    | 130 $\pm$ 4                      | 119 $\pm$ 1       | 126 $\pm$ 4                      | 125 $\pm$ 4         |
| 5 $\alpha$ -Dihydrotestosterone | 104 $\pm$ 3                      | 85.2 $\pm$ 1.6    | 92.7 $\pm$ 1.7                   | 98.9 $\pm$ 6.9      |
| Androstenedione                 | 110 $\pm$ 3                      | 128 $\pm$ 9       | 135 $\pm$ 4                      | 127 $\pm$ 6         |
| Androstenediol                  | 97.2 $\pm$ 2.4                   | 93.6 $\pm$ 4.6    | 96.1 $\pm$ 4.1                   | 103 $\pm$ 4         |
| DEHA                            | 107 $\pm$ 6                      | 109 $\pm$ 3       | 109 $\pm$ 2                      | 105 $\pm$ 7         |
| <b>Progestogen</b>              |                                  |                   |                                  |                     |
| Progesterone                    | 103 $\pm$ 3                      | 103 $\pm$ 3       | 99.0 $\pm$ 4.2                   | 98.1 $\pm$ 1.5      |
| <b>Pregnenolone</b>             | <b>90.5 <math>\pm</math> 3.6</b> | --- <sup>a</sup>  | <b>58.2 <math>\pm</math> 8.6</b> | --- <sup>a</sup>    |
| 17 $\alpha$ -OH-Progesterone    | 103 $\pm$ 7                      | 96.0 $\pm$ 5.6    | 95.2 $\pm$ 4.3                   | 92.1 $\pm$ 2.8      |
| 17 $\alpha$ -OH-Pregnenolone    | 93.1 $\pm$ 6.5                   | 91.7 $\pm$ 2.6    | 98.5 $\pm$ 3.4                   | 98.1 $\pm$ 2.0      |
| <b>Corticosteroid</b>           |                                  |                   |                                  |                     |
| Cortisone                       | 129 $\pm$ 3                      | 146 $\pm$ 9       | 146 $\pm$ 10                     | 141 $\pm$ 7         |
| Cortisol                        | 93.0 $\pm$ 1.0                   | 95.0 $\pm$ 7.8    | 96.7 $\pm$ 8.7                   | 84.8 $\pm$ 2.5      |
| 11-Deoxycortisol                | 105 $\pm$ 2                      | 96.8 $\pm$ 2.3    | 95.7 $\pm$ 6.0                   | 98.0 $\pm$ 5.3      |
| 11-Deoxycorticosterone          | 93.8 $\pm$ 5.7                   | 85.6 $\pm$ 0.8    | 87.6 $\pm$ 3.6                   | 88.8 $\pm$ 3.2      |
| 11-Dehydrocorticosterone        | 101 $\pm$ 5                      | 114 $\pm$ 5       | 115 $\pm$ 4                      | 110 $\pm$ 6         |
| Corticosterone                  | 88.2 $\pm$ 0.5                   | 73.0 $\pm$ 2.2    | 76.6 $\pm$ 1.8                   | 70.6 $\pm$ 3.3      |
| Aldosterone                     | 97.5 $\pm$ 3.2                   | 87.7 $\pm$ 2.9    | 92.1 $\pm$ 2.3                   | 96.2 $\pm$ 2.1      |

<sup>a</sup>recoveries were not calculated.

**Table S3** R value of the calibration curve of all analytes in neat solution.

| Analytes                        | R      |
|---------------------------------|--------|
| <b>Estrogen</b>                 |        |
| Estrone                         | 0.9997 |
| Estradiol                       | 0.9985 |
| Estriol                         | 0.9980 |
| <b>Androgen</b>                 |        |
| Testosterone                    | 0.9998 |
| 5 $\alpha$ -Dihydrotestosterone | 0.9994 |
| Androstenedione                 | 0.9993 |
| Androstenediol                  | 0.9999 |
| DEHA                            | 0.9998 |
| <b>Progestogen</b>              |        |
| Progesterone                    | 0.9995 |
| Pregnenolone                    | 0.9997 |
| 17 $\alpha$ -OH-Progesterone    | 0.9994 |
| 17 $\alpha$ -OH-Pregnenolone    | 0.9994 |
| <b>Corticosteroid</b>           |        |
| Cortisone                       | 0.9973 |
| Cortisol                        | 0.9997 |
| 11-Deoxycortisol                | 0.9995 |
| 11-Deoxycorticosterone          | 0.9999 |
| 11-Dehydrocorticosterone        | 0.9995 |
| Corticosterone                  | 0.9997 |
| Aldosterone                     | 0.9995 |



**Table S4** Steroid hormone concentrations measured in twenty human urine samples from the general populations in New York, USA in 2022.

| Anlaytes                        | DF% | Min<br>(ng/mL) | Max<br>(ng/mL) | Mean<br>(ng/mL) | SD<br>(ng/mL) | GM<br>(ng/mL) |
|---------------------------------|-----|----------------|----------------|-----------------|---------------|---------------|
| <b>Estrogen</b>                 |     |                |                |                 |               |               |
| Estrone                         | 100 | 0.11           | 72.0           | 9.43            | 15.7          | 4.20          |
| Estradiol                       | 100 | 6.35           | 810            | 175             | 229           | 70.3          |
| Estriol                         | 85  | < LOD          | 19.9           | 6.65            | 6.53          | 3.95          |
| <b>Androgen</b>                 |     |                |                |                 |               |               |
| Testosterone                    | 100 | 0.81           | 73.5           | 10.8            | 16.9          | 5.36          |
| 5 $\alpha$ -Dihydrotestosterone | 95  | < LOD          | 7.00           | 1.92            | 2.13          | 1.18          |
| Androstenedione                 | 100 | 1.15           | 16.2           | 5.83            | 4.09          | 4.64          |
| Androstenediol                  | 100 | 2.41           | 218            | 66.6            | 71.1          | 32.9          |
| DEHA                            | 100 | 22.3           | 1265           | 284             | 333           | 152           |
| <b>Progestogen</b>              |     |                |                |                 |               |               |
| Progesterone                    | 100 | 0.09           | 0.58           | 0.34            | 0.15          | 0.30          |
| Pregnenolone                    | 65  | < LOD          | 8.95           | 3.71            | 2.83          | 2.66          |
| 17 $\alpha$ -OH-Progesterone    | 95  | < LOD          | 1.76           | 0.51            | 0.37          | 0.42          |
| 17 $\alpha$ -OH-Pregnenolone    | 35  | < LOD          | 8.00           | 4.16            | 2.44          | 3.37          |
| <b>Corticosteroid</b>           |     |                |                |                 |               |               |
| Cortisone                       | 100 | 13.1           | 462            | 107             | 97.0          | 80.7          |
| Cortisol                        | 100 | 5.65           | 316            | 65.9            | 67.7          | 45.3          |
| 11-Deoxycortisol                | 100 | 0.12           | 4.00           | 0.87            | 0.79          | 0.69          |
| 11-Deoxycorticosterone          | 100 | 0.95           | 4.92           | 2.84            | 1.08          | 2.63          |
| 11-Dehydrocorticosterone        | 100 | 4.85           | 317            | 37.4            | 67.3          | 21.4          |
| Corticosterone                  | 100 | 2.57           | 79.5           | 15.3            | 16.4          | 11.0          |
| Aldosterone                     | 45  | < LOD          | 4.58           | 2.14            | 1.28          | 1.87          |

Abbreviations: DF, detection frequency; SD, standard deviation; GM, geometric mean; DEHA, dehydroepiandrosterone.

**Table S5** Steroid hormone concentrations measured in the pooled human serum purchased from Sigma-Aldrich.

| Analytes                        | Mean (ng/mL) | SD (ng/mL) |
|---------------------------------|--------------|------------|
| <b>Estrogen</b>                 |              |            |
| Estrone                         | < LOD        |            |
| Estradiol                       | < LOD        |            |
| Estriol                         | < LOD        |            |
| <b>Androgen</b>                 |              |            |
| Testosterone                    | 4.70         | 0.03       |
| 5 $\alpha$ -Dihydrotestosterone | 0.30         | 0.01       |
| Androstenedione                 | 0.52         | 0.05       |
| Androstenediol                  | 0.63         | 0.03       |
| DEHA                            | 9.05         | 0.51       |
| <b>Progestogen</b>              |              |            |
| Progesterone                    | < LOD        |            |
| Pregnenolone                    | < LOD        |            |
| 17 $\alpha$ -OH-Progesterone    | 0.55         | 0.02       |
| 17 $\alpha$ -OH-Pregnenolone    | 0.74         | 0.16       |
| <b>Corticosteroid</b>           |              |            |
| Cortisone                       | 12.7         | 0.35       |
| Cortisol                        | 72.5         | 2.29       |
| 11-Deoxycortisol                | 0.23         | 0.01       |
| Aldosterone                     | < LOD        |            |
| 11-Deoxycorticosterone          | < LOD        |            |
| 11-Dehydrocorticosterone        | 0.63         | 0.08       |
| Corticosterone                  | 1.35         | 0.10       |
